# Supplementary material
Source: Springer Nature journal article supplement (https://www.springermedizin.de/resource/supplementary/13024_2009_581_MOESM5_ESM.pdf/9643422)

**A**Densitometric units (SOD1/  $\beta$ -actin)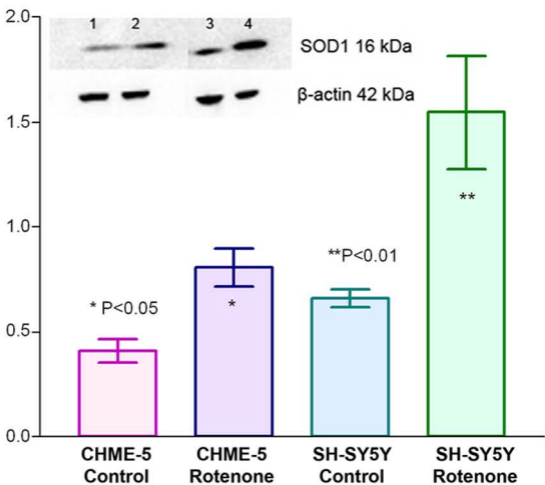**B**Densitometric units (SOD2/  $\beta$ -actin)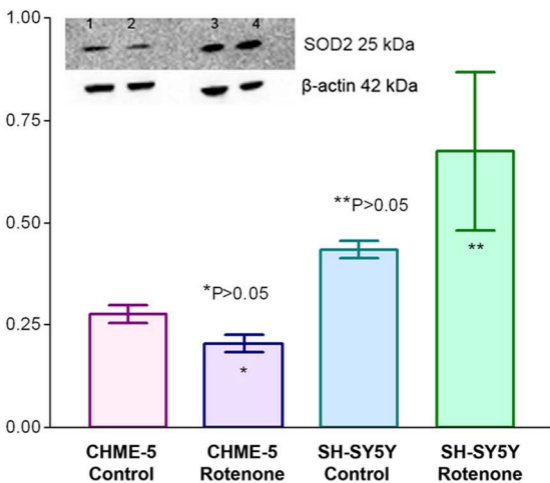

Supplement: MOESM5 [file 9643422]
